# Supplementary material
Source: PubMed Central journal article supplement (PMC6492992)
Supplement: CNS-20-1045-s005.pdf [file CNS-20-1045-s005.pdf]

## Supplementary Method:

### Treatment of Autophagy Inhibitor 3-Methyladenine (3-MA)

3-MA (PI3K inhibitor) inhibits the formation of autophagosome, thus acts as a specific inhibitor of autophagic/lysosomal protein degradation.<sup>1</sup> It has been useful in defining the role of autophagy under various physiological conditions, such as cerebral ischemia.<sup>2,3</sup> 3-MA at the concentration of 1 mM effectively blocked the activation of autophagy as evidenced by inhibiting the production of LC3-II.<sup>4</sup> Rat cortical neurons were incubated with 3-MA (1 mM) during OGD/RP treatment. Briefly, 3-MA (1 mM) was added into EBSS solution before OGD treatment and after 6 h OGD, fresh regular culture medium with 1 mM 3-MA was replaced when neurons underwent prolonged RP for 24, 48, or 72 h. Cell samples were collected and processed for western blot assays. The expression levels of autophagy markers as well as BNIP3/Bcl-2 were evaluated.

### References

1. Seglen PO, Gordon PB. 3-Methyladenine: specific inhibitor of autophagic/lysosomal protein degradation in isolated rat hepatocytes. *Proc Natl Acad Sci U S A* 1982 Mar; **79**(6): 1889-1892.
2. Qin AP, Liu CF, Qin YY, Hong LZ, Xu M, Yang L, *et al.* Autophagy was activated in injured astrocytes and mildly decreased cell survival following glucose and oxygen deprivation and focal cerebral ischemia. *Autophagy* 2010 Aug 3; **6**(6).
3. Scarlatti F, Bauvy C, Ventruti A, Sala G, Cluzeaud F, Vandewalle A, *et al.* Ceramide-mediated macroautophagy involves inhibition of protein kinase B and up-regulation of beclin 1. *J Biol Chem* 2004 Apr 30; **279**(18): 18384-18391.
4. Shi R, Weng J, Zhao L, Li XM, Gao TM, Kong J. Excessive autophagy contributes to neuron death in cerebral ischemia. *CNS Neurosci Ther* 2012 Mar; **18**(3): 250-260.
