# Supplementary material
Source: PubMed Central journal article supplement (PMC6492992)

A

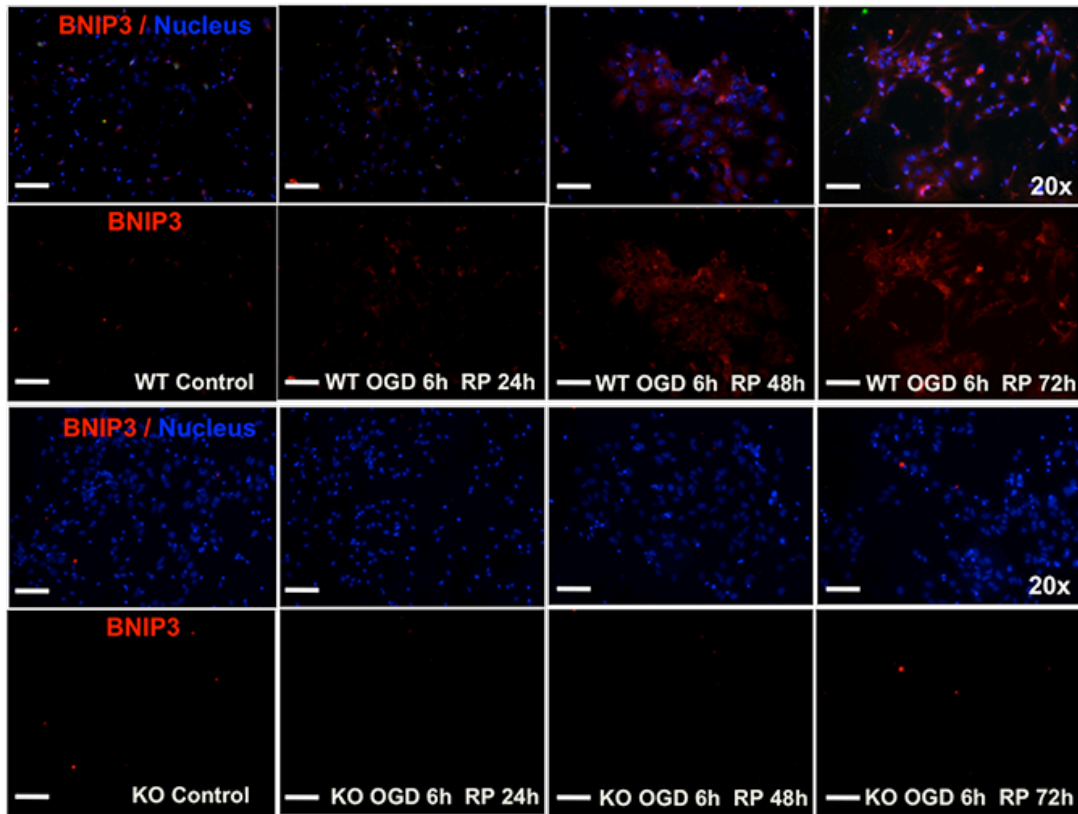

B

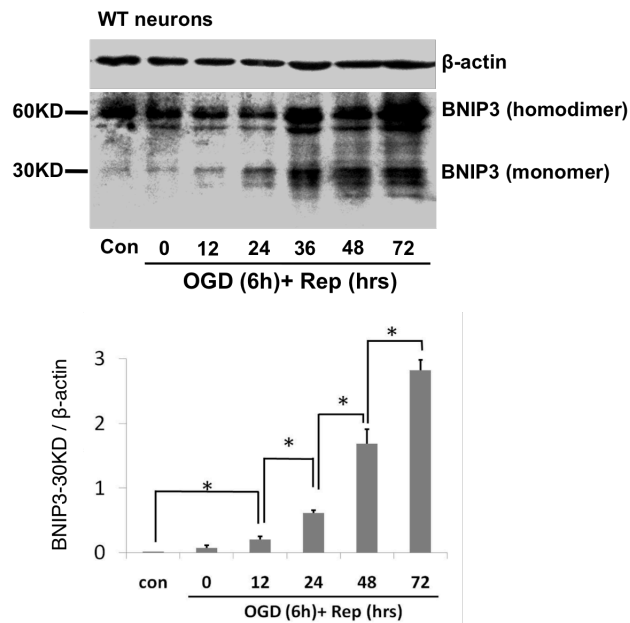

C

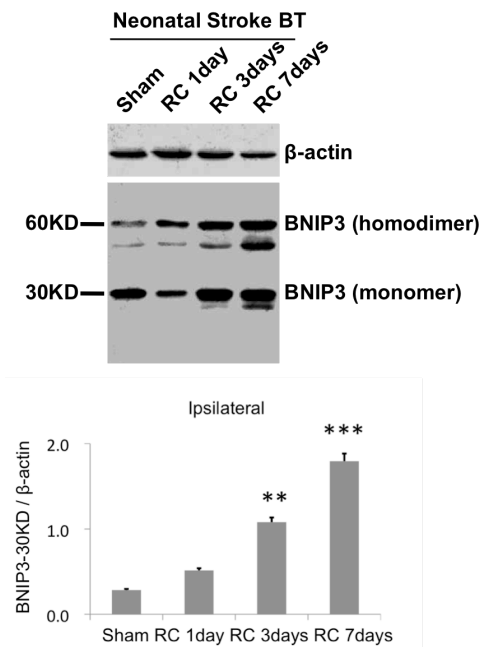

Supplement: CNS-20-1045-s001.pdf [file CNS-20-1045-s001.pdf]

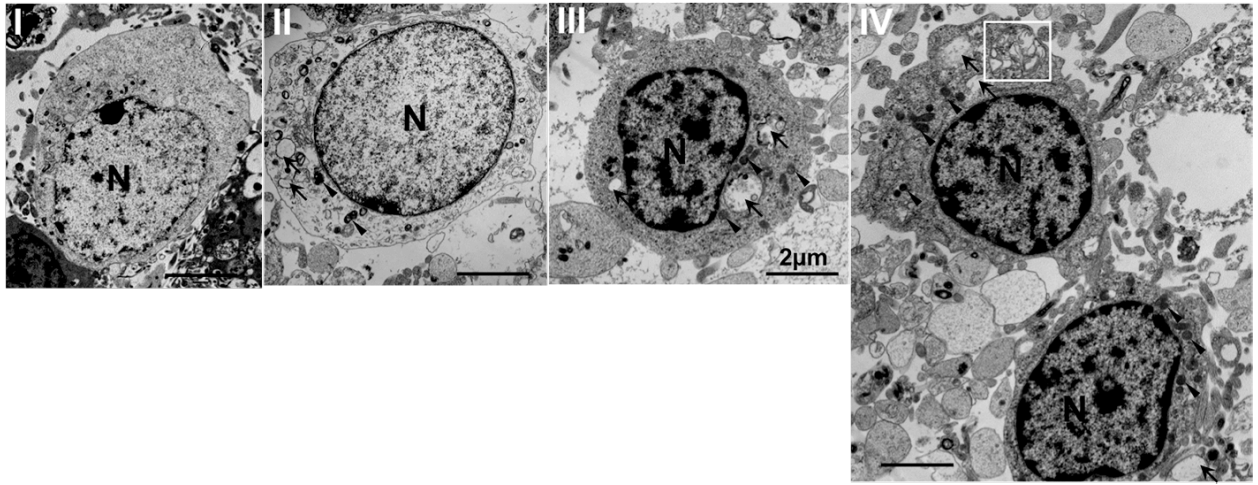

Supplement: CNS-20-1045-s002.pdf [file CNS-20-1045-s002.pdf]

**A**

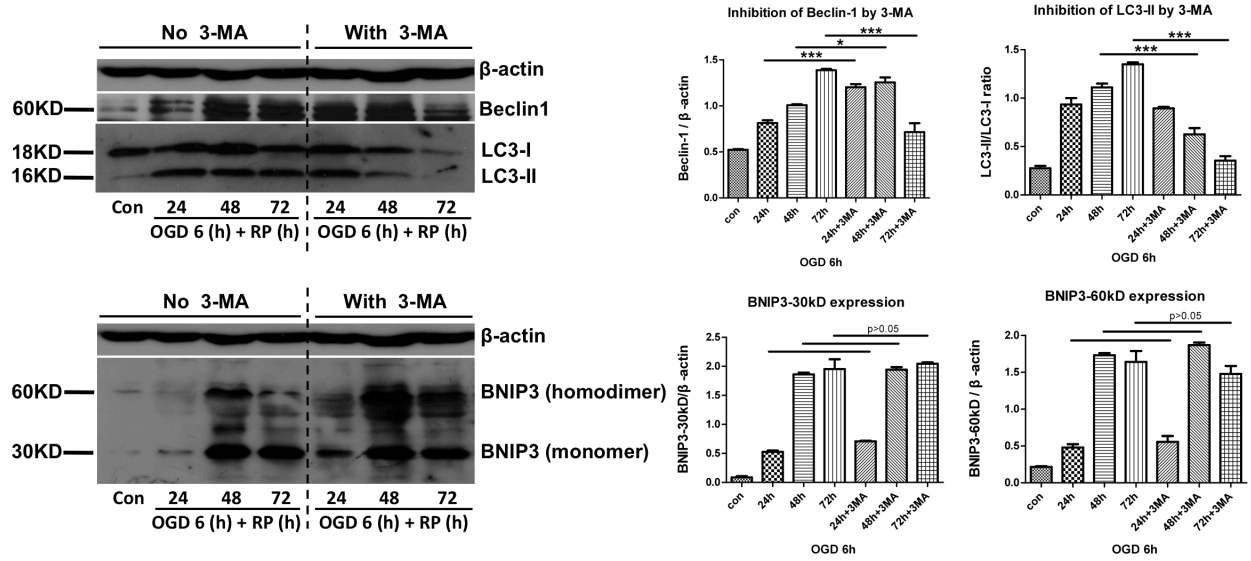

**B**

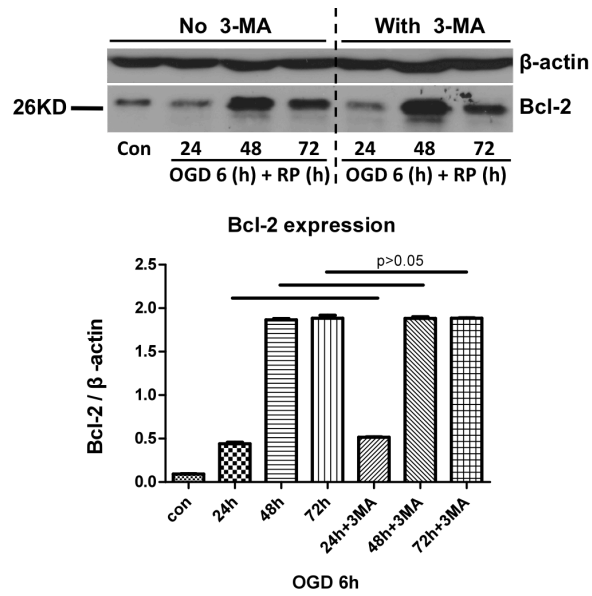

Supplement: CNS-20-1045-s003.pdf [file CNS-20-1045-s003.pdf]

**A**

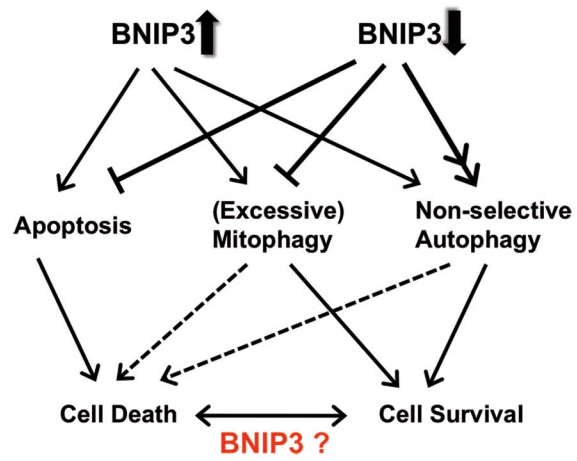

**B**

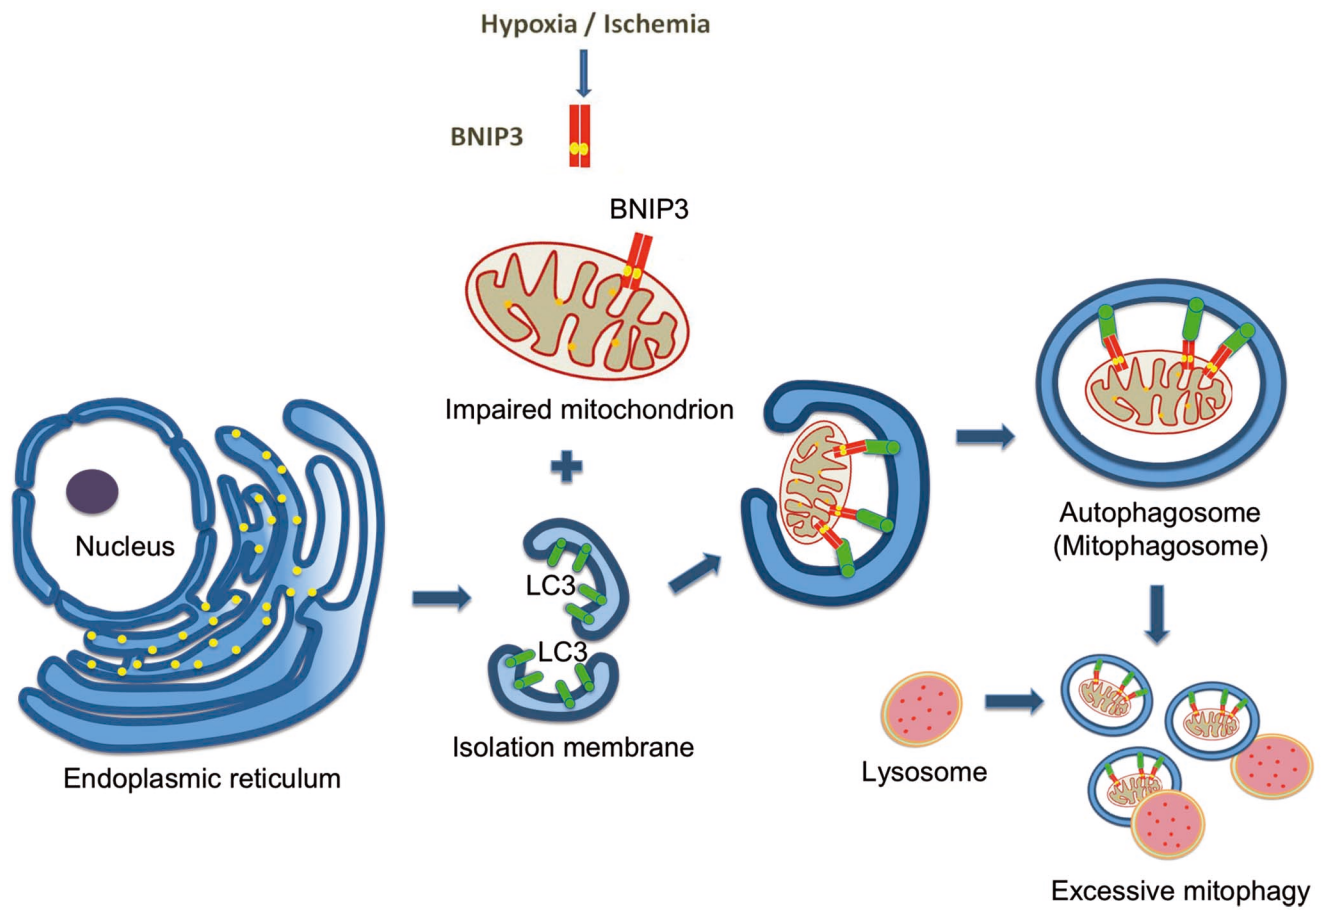

Supplement: CNS-20-1045-s004.pdf [file CNS-20-1045-s004.pdf]
